# Supplementary material for: The small-molecule compound AC-73 targeting CD147 inhibits leukemic cell proliferation, induces autophagy and increases the chemotherapeutic sensitivity of acute myeloid leukemia cells
Source: PubMed Central journal article supplement — Haematologica. 2018 Nov 22;104(5):973–85. doi: 10.3324/haematol.2018.199661 (PMC6518905; doi:10.3324/haematol.2018.199661), 2019-05
Supplement: 2018_199661-Disclosures_and_Contributions.pdf [file 2018_199661-Disclosures_and_Contributions.pdf]

Haematologica  
HAEMATOL/2018/199661  
Version 3

The small-molecule compound AC-73 targeting CD147 inhibits leukemic cell proliferation, induces autophagy and increases the chemotherapeutic sensitivity of acute myeloid leukemia cells

Isabella Spinello, Ernestina Saulle, Maria Teresa Quaranta, Luca Pasquini, Elvira Pelosi, Germana Castelli, Tiziana Ottone, Maria Teresa Voso, Ugo Testa, and Catherine Labbaye

Disclosures: none The authors declare that they have no potential conflicts of interests.

Contributions: IS participated in design of the study, performed experiments and analyzed data. ES performed experiments and analyzed data. MT-Q, EP and GC performed experiments. LP performed flow cytometry analysis. TO and MT-V provided leukemic blasts from patients and contributed to manuscript editing. UT analyzed data and revised the paper. CL conceptualized the study and designed the research strategy, analyzed data, and wrote the manuscript. All authors contributed to review and approved the manuscript.
